# Supplementary material for: A neuromechanistic model for rhythmic beat generation
Source: PubMed Central journal article supplement (PMC6508617; doi:10.1371/journal.pcbi.1006450), 2019-05-09
Supplement: pcbi.1006450.s001.pdf [file pcbi.1006450.s001.pdf]

## Supporting information

**S1 Appendix.** The model for the *BG* consists of a set of biophysical conductance-based equations which we call the  $I_{NaP}$  model that incorporate a low-threshold calcium current  $I_{CaT}$ , a sag current,  $I_h$ , a persistent sodium current  $I_{NaP}$  and a leak current,  $I_L$ . The current balance equations are given by

$$C \frac{dV}{dt} = I_{bias} + I_{int} - g_L[V - E_L] - g_{CaT}m_\infty(V)h[V - E_{Ca}] - g_h r[V - E_h] - g_{NaP}a_\infty(v)[v - E_{Na}] \quad (1)$$

$$\frac{dh}{dt} = \frac{h_\infty(V) - h}{\tau_h(V)} \quad (2)$$

$$\frac{dr}{dt} = \frac{r_\infty(V) - r}{\tau_r(V)} \quad (3)$$

The term  $I_{bias}$  refers to a drive whose value determines whether the isolated *BG* can oscillate and if so, at which frequency. We set  $I_{int} = -33\mu\text{A}/\text{cm}^2$  so that if  $I_{bias} = 0\mu\text{A}/\text{cm}^2$  there are no oscillations. The parameters  $g_{CaT}, g_h, g_{NaP}, g_L$  and  $E_{Ca}, E_h, E_{Na}, E_L$  refer to conductances and reversal potentials for the calcium, sag, sodium and leak currents, respectively. The functions  $x_\infty(V) = 1/(1 + \exp(-(V - v_x)/k_x))$  for  $x = m, a, r, h$  are each sigmoidal functions with half-activation voltages  $v_x$  and accompanying slopes  $k_x$ . The time constants are  $\tau_h(V) = \tau_L/(1 + \exp((V - v_h)/k_h)) + \tau_R(1 + \exp(-(V - v_h)/k_h))$  and  $\tau_r(V) = \tau_{r_{max}}/\cosh((V - v_{r_\tau})/(2k_{r_\tau}))$ . The  $T$ -current is considered to have instantaneous activation, modeled by  $m_\infty(V)$  and a slow inactivation, governed by the  $h$  variable. The sag current simply has a slow activation variable  $r$ . The persistent sodium current has just instantaneous activation given by  $a_\infty(V)$ . The parameter values are as follows:  $C = 1$ ,  $g_{CaT} = 11$ ,  $g_h = 1$ ,  $g_{NaP} = 0.1$ ,  $g_L = 1.6$ ,  $E_{Ca} = 50$ ,  $E_h = -30$ ,  $E_{Na} = 50$ ,  $E_L = -70$ ,  $v_m = -40$ ,  $k_m = 6.5$ ,  $v_a = -67$ ,  $k_a = 1$ ,  $v_r = -70$ ,  $k_r = 12$ ,  $v_h = -60$ ,  $k_h = 6$ ,  $v_{r_\tau} = -75$ ,  $k_{r_\tau} = 8$ ,  $\tau_L = 30$ ,  $\tau_R = 5$ ,  $\tau_{r_{max}} = 850$  (where capacitance is in units of  $\mu\text{F}/\text{cm}^2$ , conductances are in  $\text{mS}/\text{cm}^2$ , time constants are in ms and all others parameter units are mV):.

The equations for the *S* neuron are

$$C_S \frac{dV_S}{dt} = I_{bias}^S + g_{stim}I_{stim}(t) - g_{L_S}[V_S - E_L] - g_{CaT_S}m_\infty(V_S)h_S[V_S - E_{Ca}] \quad (4)$$

$$\frac{dh_S}{dt} = \frac{h_\infty(V_S) - h_S}{\tau_h(V_S)} \quad (5)$$

$$(6)$$

The term  $I_{stim}(t)$  is the periodic current provided from the stimulus. During each cycle, it is positive for 25 ms and 0 otherwise. It is taken to be large enough to ensure that *S* fires within 5 ms of sound onset times. The  $m_\infty$ ,  $h_\infty$  and  $\tau_h$  functions are as above, the parameter values are the same unless otherwise stated:  $I_{bias}^S = -14$ ,  $g_{stim} = 6$ ,  $g_{CaT}^S = 10$  (units as above).

The  $\gamma$  counters are constructed as follows. Solve  $x' = -x/\tau_x$  with  $x(0) = 2$  until it reaches 1 at  $t = t_g$  and is reset to 2;  $x(t_g^-) = 1$  reset to  $x(t_g^+) = 2$ . The counters keep track of the number of resets. We chose  $\tau_x = 40$  ms which yields an inter-spike interval of 27.73 ms (frequency of 36.06 Hz). Heterogeneity between the *BG* and *S* counters of roughly 10% was introduced to the  $IOI_S$  by varying  $\tau_x$ . In the case of stochasticity, Ornstein-Uhlenbeck noise was added to the  $x$  variable, with a timescale of 5 ms and Gaussian white noise with mean 0 and standard deviation 0.005. All numerical simulations were carried out in MATLAB.
